# Supplementary material for: Control of thermal deformation with photonic sintering of ultrathin nanowire transparent electrodes
Source: Royal Society of Chemistry journal article supplement (doi:10.1039/c9nr09383d), 2020-01-01
Supplement: c9nr09383d1.pdf [file c9nr09383d1.pdf]

## Electronic Supplementary Information

### Control of Thermal Deformation with Photonic Sintering of Ultrathin Nanowire Transparent Electrodes

Zhaoyang Zhong,<sup>†a</sup> Seung-Hyun Lee,<sup>†a</sup> Pyeongsam Ko,<sup>ab</sup> Sin Kwon,<sup>a</sup> Hongseok Youn,<sup>b</sup> Jae Young Seok,<sup>\*a</sup> and  
Kyoohee Woo,<sup>a\*</sup>

<sup>a</sup>*Advanced Manufacturing Systems Research Division, Korea Institute of Machinery and Materials (KIMM),  
Daejeon 305-343, Republic of Korea. E-mail: khwoo@kimm.re.kr, seokjy89@kimm.re.kr*

<sup>b</sup>*Department of Mechanical Engineering, Hanbat National University, Dongseodaero 125, Yuseong-gu,  
Daejeon, 34158, Republic of Korea*

<sup>†</sup> Both authors contribute equally to this work.

**Table S1.** The comparison of characteristics of IPL-sintered NW flexible transparent electrodes

| Optoelectrical property  |       |       | Mechanical flexibility                       |                |                  | Ref.      |
|--------------------------|-------|-------|----------------------------------------------|----------------|------------------|-----------|
| Rs                       | T%    | FoM*  | Bending radius                               | Bending cycles | R/R <sub>0</sub> |           |
| 14.4 $\Omega/\text{sq}$  | 89.5% | 0.023 | Bending radius: 10 mm<br>Twisting angle: 45° | 20000          | ~1               | This work |
| 26 $\Omega/\text{sq}$    | 88%   | 0.011 | 2 mm                                         | 1000           | 1.15             | 33        |
| 24.5 $\Omega/\text{sq}$  | 90%   | 0.014 | 0.5 mm                                       | 50000          | ~1               | 34        |
| 51.27 $\Omega/\text{sq}$ | 95.3% | 0.012 | -                                            | 10000          | 1.06             | 35        |
| 19 $\Omega/\text{sq}$    | 83%   | 0.008 | -                                            | 1000           | 1                | 36        |

\*FoM: Figure of Merit for transparent conductive materials defined by G. Haacke. <sup>37</sup>

**Table S2.** The material properties and boundary conditions used in the simulation

|                                                                    |                                               |
|--------------------------------------------------------------------|-----------------------------------------------|
| Specific heat capacity of Ag NW/PET                                | 235/1030 ( $\text{J kg}^{-1} \text{K}^{-1}$ ) |
| Density of Ag NW/PET                                               | 10500/1430 ( $\text{kg m}^{-3}$ )             |
| Thermal conductivity of Ag NW/PET                                  | 429/0.189 ( $\text{W m}^{-1} \text{K}^{-1}$ ) |
| Convective heat transfer coefficient on top surface of Ag NW & PET | 30 ( $\text{W m}^{-2} \text{K}^{-1}$ )        |
| Convective heat transfer coefficient on bottom surface of PET      | 300 ( $\text{W m}^{-2} \text{K}^{-1}$ )       |
| Emissivity of Ag NW/PET                                            | 0.1/0.9                                       |
| Interface heat transfer coefficient between Ag NW and PET          | 120,000 ( $\text{W m}^{-2} \text{K}^{-1}$ )   |
| Room temperature                                                   | 20.15 °C                                      |
| Compensation factor of Ag NW/PET                                   | 0.043/0.122                                   |

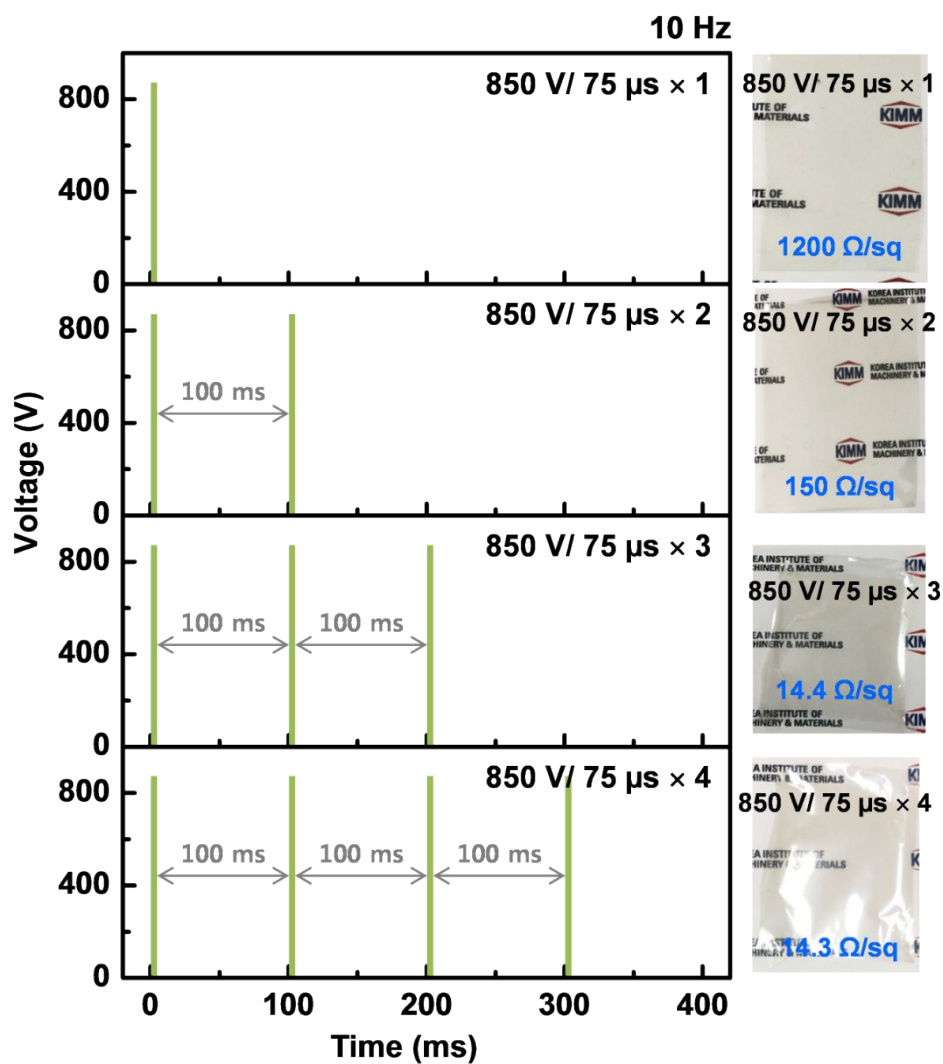

**Figure S1.** Multiple pulse energy irradiation conditions with controlled number of pulses from 1 to 4. Each pulse was operated at 850 V/75  $\mu\text{s}$  and the frequency was set to 10 Hz. The photographs are of the Ag NW films and their sheet resistance values after IPL irradiation.

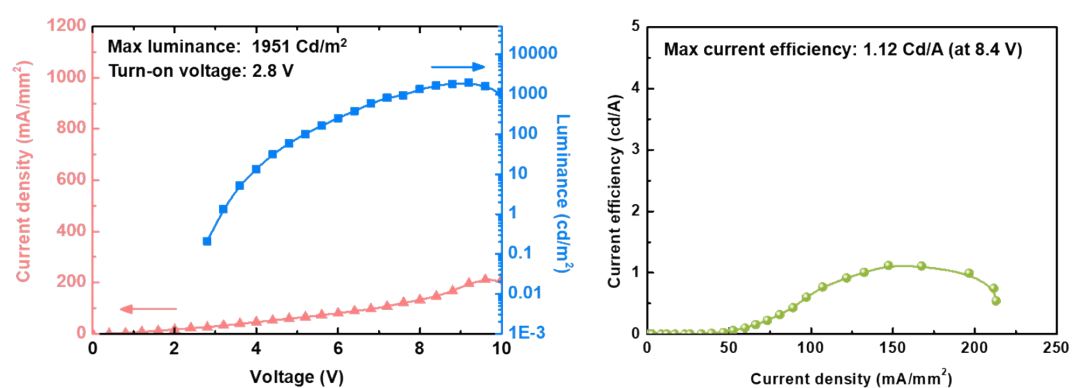

**Figure S2.** Current density–voltage–luminance ( $J$ – $V$ – $L$ ) characteristics and current efficiency of the OLED device based on the highly flexible Ag NW transparent electrode on the 10  $\mu\text{m}$  ultrathin PET substrate.

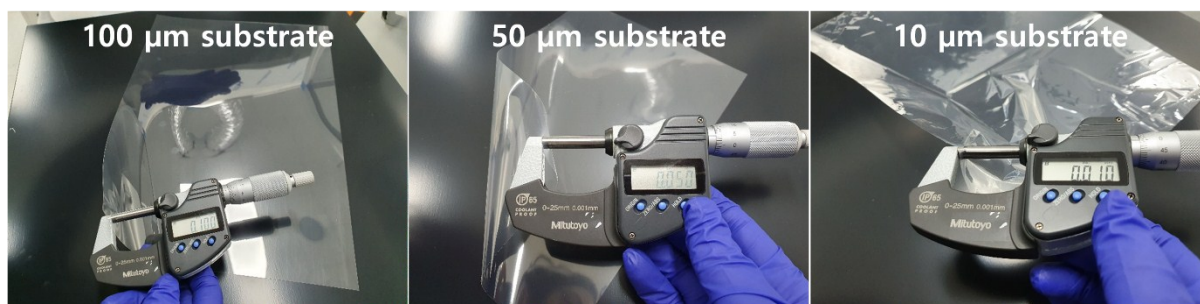

**Figure S3.** Photographs for measuring the substrate thickness by using a digital Vernier Caliper.
